# Supplementary material for: Novel Gemini Surfactant for Binding Eu(III)-Polyoxometalate into Hydrogels and Polymer Latexes
Source: MDPI journal article supplement (doi:10.3390/gels8120786), 2022-11-30
Supplement: s1 [file s1]

Supplementary Materials

# Novel Gemini Surfactant for Binding Eu(III)-Polyoxometalate into Hydrogels and Polymer Latexes

Marin Micutz <sup>1</sup>, Viorel Circu <sup>2</sup>, Monica Ilis <sup>2</sup> and Teodora Staicu <sup>1,\*</sup>

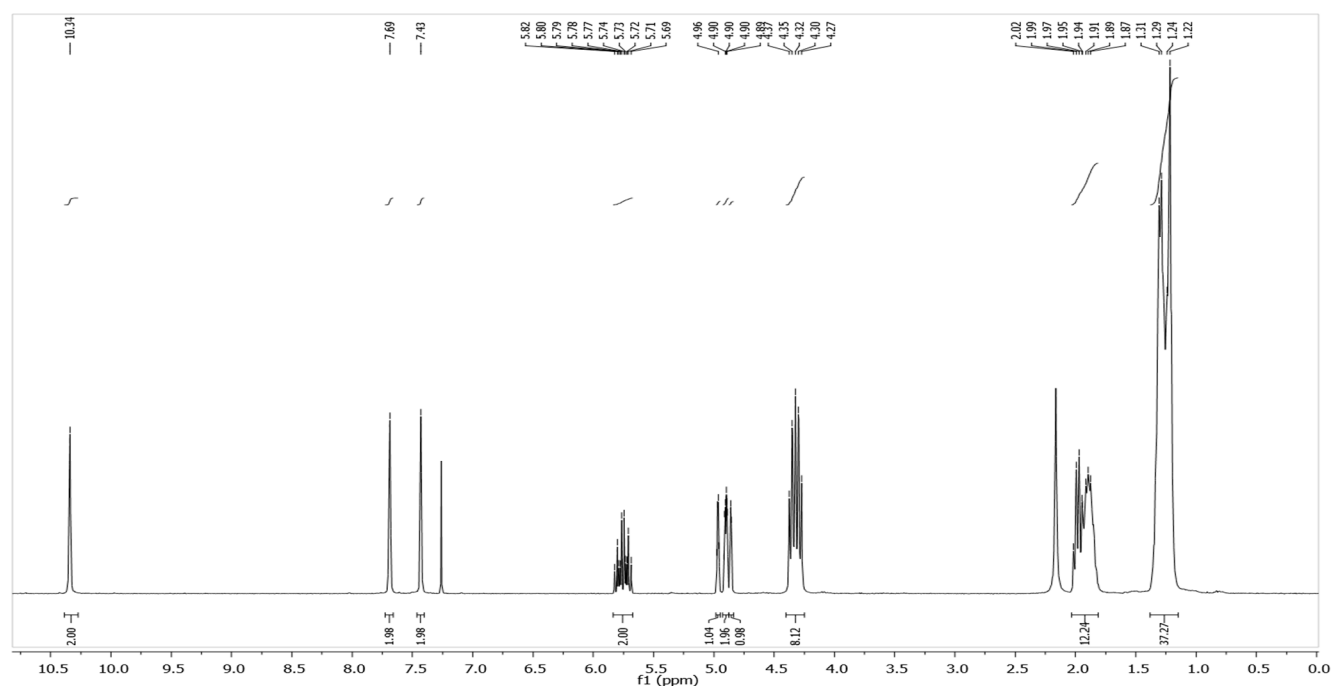

**Figure S1.** <sup>1</sup>H NMR spectrum for 1,1'-(1,10-decanediyl)-bis[3-(undec-10-en-1-yl)-imidazolium] bromide salt, BIBr.

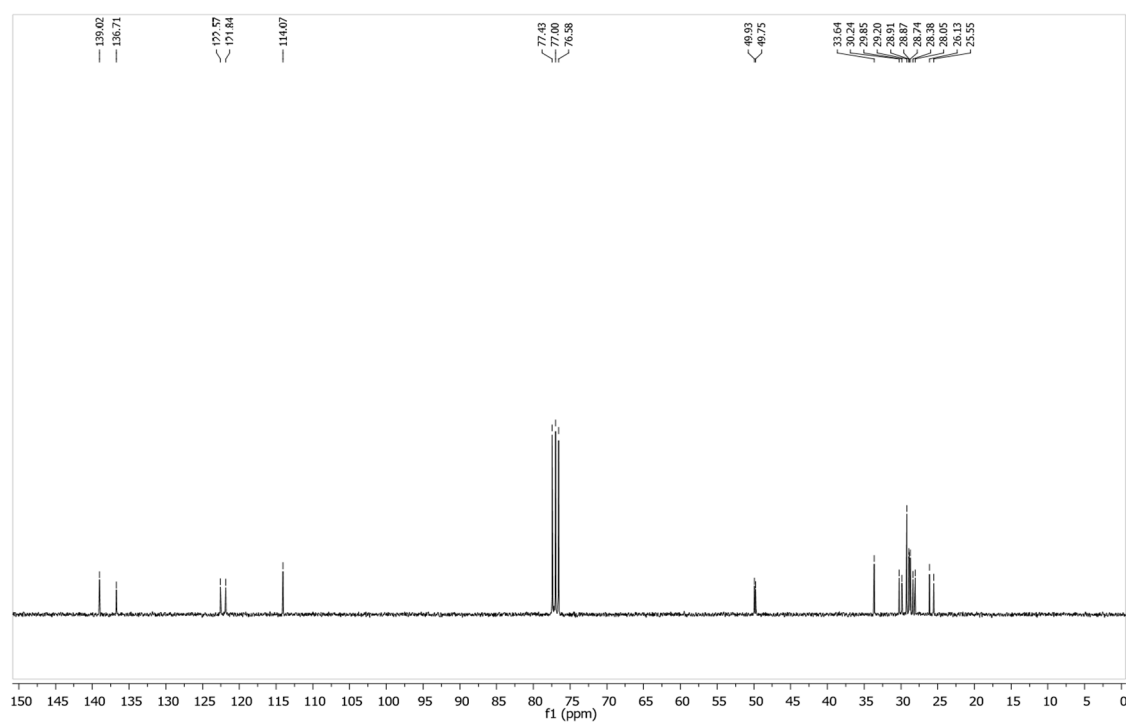

Figure S2. <sup>13</sup>C NMR spectrum for BIBr.

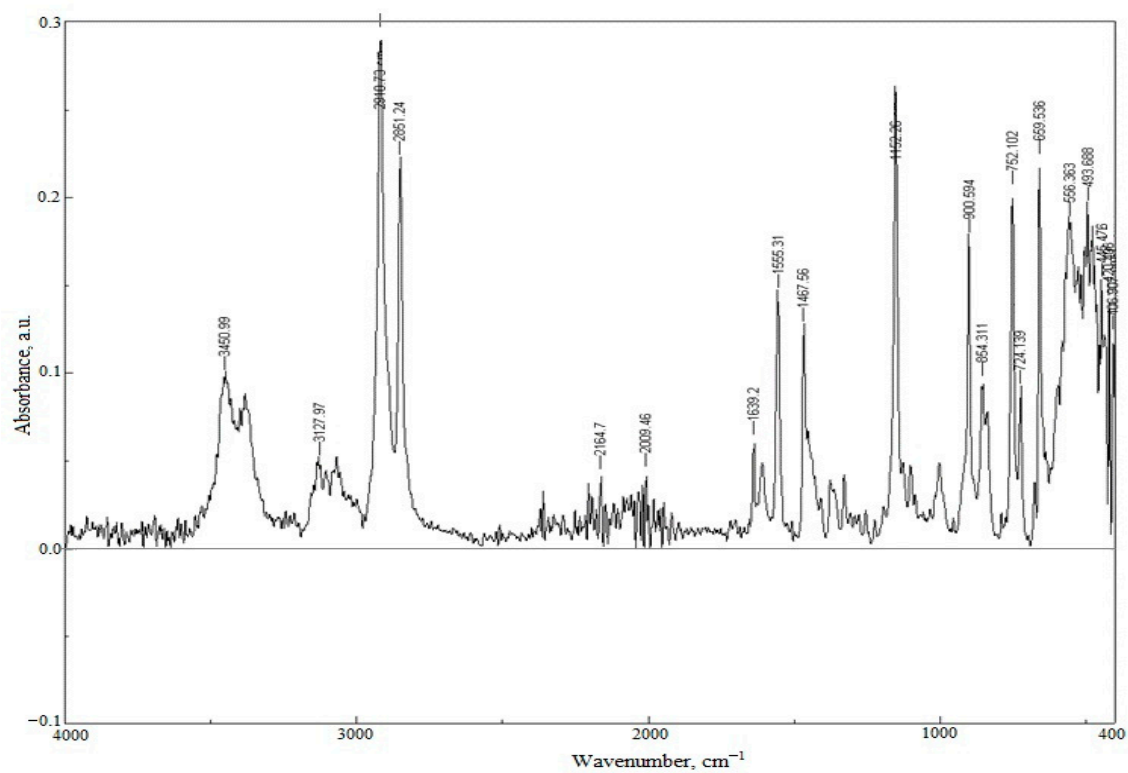

Figure S3. IR spectrum for BIBr.
